# Supplementary material
Source: publisher figshare collection journal article supplement (https://sage.figshare.com/ndownloader/files/23659091)
Supplement: Supplementary file 1 [file 23659091]

## Sheet: SupplTable1
Suppl. Table 1: 302 significant links (|Z| > 2) between source genes and axon-growth relevant transcription factors (targets). The table corresponds to the heatmap in Fig. 2A of the main paper. In addition, we annotated kinase source genes (orange boxes) that support (red boxes) or hamper (green boxes) axon growth when inhibited or overexpressed. We further determined a set of 47 source genes tha…
source	kinase	inhibited	over-expr.	both (ant-)agonist TF	sig. source gene	TF	axon-growth	Z-score
Egln2					s	Hif1a	ptf	-127.561
Tecr					s	Arnt	ptf	-98.0285
Calm2					s	Arnt	ptf	-66.6934
Usp19					s	Hif1a	ptf	-56.4317
Dhcr24					s	Arnt	ptf	-51.868
Calm1					s	Arnt	ptf	-48.4043
Man1a2					s	Cux1	ntf	-47.3214
Fdft1					s	Arnt	ptf	-45.3177
Camk1g	kin		oe_pos	x	s	Creb1	ptf	-42.8243
Camk1g	kin		oe_pos	x	s	Creb3l2	ntf	-42.8243
Camk1g	kin		oe_pos	x	s	Creb5	ptf	-42.8243
Camk1g	kin		oe_pos	x	s	Atf1	ptf	-42.8237
Lrrk2	kin				s	Hif1a	ptf	-41.1828
Mapk3	kin			x	s	Creb1	ptf	-40.6878
Mapk3	kin			x	s	Creb3l2	ntf	-40.5784
Mapk3	kin			x	s	Creb5	ptf	-40.5784
Mapk3	kin			x	s	Fos	ptf	-40.541
Mapk3	kin			x	s	Jun	ptf	-40.518
Mapk3	kin			x	s	Cebpb	ptf	-40.4633
Mapk3	kin			x	s	Mef2c	ptf	-40.4633
Mapk3	kin			x	s	Hif1a	ptf	-40.4575
Mdh1					s	Arnt	ptf	-33.8841
Rps6ka4	kin	ko_pos	oe_pos	x	s	Creb1	ptf	-32.7724
Rps6ka4	kin	ko_pos	oe_pos	x	s	Creb3l2	ntf	-32.7724
Rps6ka4	kin	ko_pos	oe_pos	x	s	Creb5	ptf	-32.7724
Lin37					s	Lin54	ptf	-30.7388
Calm3					s	Arnt	ptf	-30.2249
Ldhb					s	Arnt	ptf	-28.9493
Rps6ka2	kin	ko_pos	oe_neg		s	Creb1	ptf	-28.0018
Scd1					s	Arnt	ptf	-27.7864
Spr					s	Arnt	ptf	-27.5503
Dhcr7					s	Arnt	ptf	-24.422
Camk1d	kin		oe_neg	x	s	Creb1	ptf	-24.1686
Camk1d	kin		oe_neg	x	s	Atf1	ptf	-24.1686
Camk1d	kin		oe_neg	x	s	Creb3l2	ntf	-24.1686
Camk1d	kin		oe_neg	x	s	Creb5	ptf	-24.1686
Scd2						Arnt	ptf	-20.8416
Hmgcs1						Arnt	ptf	-19.9585
Apc2						Hnf1a	ptf	-18.1737
Rps6ka3	kin	ko_pos				Creb1	ptf	-16.7942
Nedd8						Hif1a	ptf	-16.2028
Bsg						Arnt	ptf	-15.4818
Naca						Jund	ptf	-15.2696
Ppp1ca				x	s	Creb1	ptf	-15.1369
Ppp1ca				x	s	Creb3l2	ntf	-15.1369
Ppp1ca				x	s	Creb5	ptf	-15.1369
Mapk10	kin		oe_pos		s	Fos	ptf	-15.075
Mapk10	kin		oe_pos		s	Jun	ptf	-15.075
Mapk10	kin		oe_pos		s	Fosl1	ptf	-15.0704
Mapk10	kin		oe_pos		s	Fosl2	ptf	-15.0704
Mapk10	kin		oe_pos		s	Junb	ptf	-15.0704
Mapk10	kin		oe_pos		s	Jund	ptf	-15.0704
Polr3g						Tbp	ntf	-14.9535
Akr7a5						Arnt	ptf	-14.8763
Man2a2						Cux1	ntf	-14.4917
Chd3						Tbp	ntf	-14.2944
Akt3	kin			x	s	Creb1	ptf	-14.1251
Akt3	kin			x	s	Creb3l2	ntf	-14.1251
Akt3	kin			x	s	Creb5	ptf	-14.1251
Akt3	kin			x	s	Jun	ptf	-14.1076
Dpy30						Gata1	ptf	-13.7407
Ldha						Arnt	ptf	-13.2956
Rrn3						Tbp	ntf	-12.9248
Eno2						Arnt	ptf	-12.8971
Prkd1	kin	ko_pos		x	s	Creb1	ptf	-12.756
Prkd1	kin	ko_pos		x	s	Atf1	ptf	-12.756
Prkd1	kin	ko_pos		x	s	Creb3l2	ntf	-12.756
Prkd1	kin	ko_pos		x	s	Creb5	ptf	-12.756
Golim4						Cux1	ntf	-12.5061
Gmpr						Arnt	ptf	-12.1721
Rps6kb1	kin				s	Fos	ptf	-12.1692
Rps6kb1	kin				s	Jun	ptf	-12.1692
Rps6ka5	kin	ko_pos	oe_neg	x	s	Creb1	ptf	-11.9012
Rps6ka5	kin	ko_pos	oe_neg	x	s	Atf1	ptf	-11.9012
Rps6ka5	kin	ko_pos	oe_neg	x	s	Creb3l2	ntf	-11.9012
Rps6ka5	kin	ko_pos	oe_neg	x	s	Creb5	ptf	-11.9012
Sirt6						Hif1a	ptf	-11.8845
Sord						Arnt	ptf	-11.4563
Impdh1						Arnt	ptf	-11.0987
Hsd17b12						Arnt	ptf	-10.5983
Mapk9	kin				s	Fos	ptf	-10.4244
Mapk9	kin				s	Jun	ptf	-10.4244
Mapk9	kin				s	Fosl1	ptf	-10.4224
Mapk9	kin				s	Fosl2	ptf	-10.4224
Mapk9	kin				s	Junb	ptf	-10.4224
Mapk9	kin				s	Jund	ptf	-10.4224
Cbr3						Arnt	ptf	-10.2102
Pgm2l1						Arnt	ptf	-10.044
Ahrr						Arnt	ptf	-9.72844
Idh1						Arnt	ptf	-9.63115
Cul2						Hif1a	ptf	-9.5989
Gamt						Arnt	ptf	-9.43047
Gsr						Arnt	ptf	-9.35733
Hsp90aa1						Arnt	ptf	-9.20588
Nefl						Arnt	ptf	-8.67849
Gpx4						Arnt	ptf	-8.44547
Hacd3						Arnt	ptf	-8.1656
Srd5a3						Arnt	ptf	-8.04323
Blvrb						Arnt	ptf	-7.91626
Degs1						Arnt	ptf	-7.548
Gsk3a	kin	ko_neg	oe_neg			Clock	ntf	-7.39194
Pycrl						Arnt	ptf	-7.31939
Camk2g	kin			x	s	Creb1	ptf	-6.92377
Camk2g	kin			x	s	Creb3l2	ntf	-6.92349
Camk2g	kin			x	s	Creb5	ptf	-6.92349
Camk2g	kin			x	s	Atf1	ptf	-6.89613
Rprd1a						Tbp	ntf	-6.33381
Mapk11	kin	ko_neg	oe_neg	x	s	Creb3l2	ntf	-6.24686
Mapk11	kin	ko_neg	oe_neg	x	s	Creb5	ptf	-6.24686
Mapk11	kin	ko_neg	oe_neg	x	s	Creb1	ptf	-6.24398
Mapk11	kin	ko_neg	oe_neg	x	s	Jun	ptf	-6.23419
Golga5						Cux1	ntf	-6.23045
Mapk11	kin	ko_neg	oe_neg	x	s	Fos	ptf	-6.22843
Mapk11	kin	ko_neg	oe_neg	x	s	Cebpb	ptf	-6.22382
Mapk11	kin	ko_neg	oe_neg	x	s	Mef2c	ptf	-6.22382
Prkaca	kin		oe_neg	x	s	Fos	ptf	-6.2172
Prkaca	kin		oe_neg	x	s	Jun	ptf	-6.21403
Prkaca	kin		oe_neg	x	s	Creb1	ptf	-6.21202
Prkaca	kin		oe_neg	x	s	Creb3l2	ntf	-6.21173
Prkaca	kin		oe_neg	x	s	Creb5	ptf	-6.21173
Mapk11	kin	ko_neg	oe_neg	x	s	Mef2a	ptf	-6.20482
Mapk11	kin	ko_neg	oe_neg	x	s	Fosl1	ptf	-6.20482
Mapk11	kin	ko_neg	oe_neg	x	s	Fosl2	ptf	-6.20482
Mapk11	kin	ko_neg	oe_neg	x	s	Junb	ptf	-6.20482
Mapk11	kin	ko_neg	oe_neg	x	s	Jund	ptf	-6.20482
Mapk11	kin	ko_neg	oe_neg	x	s	Mef2d	ptf	-6.20482
Prkaca	kin		oe_neg	x	s	Mef2c	ptf	-6.19849
Rbx1						Hif1a	ptf	-6.19359
Prkaca	kin		oe_neg	x	s	Atf1	ptf	-6.18927
Prkaca	kin		oe_neg	x	s	Mef2a	ptf	-6.18294
Prkaca	kin		oe_neg	x	s	Mef2d	ptf	-6.18294
Prkaca	kin		oe_neg	x	s	Crem	ptf	-6.17948
Gmpr2						Arnt	ptf	-6.08965
Me1						Arnt	ptf	-5.92438
Prkca	kin	ko_pos		x	s	Fos	ptf	-5.82335
Prkca	kin	ko_pos		x	s	Creb3l2	ntf	-5.81701
Prkca	kin	ko_pos		x	s	Creb5	ptf	-5.81701
Prkca	kin	ko_pos		x	s	Creb1	ptf	-5.8169
Prmt1				x		Gata1	ptf	-5.79481
Prmt1				x		Tbp	ntf	-5.78329
Cog4						Cux1	ntf	-5.71074
Srd5a1						Arnt	ptf	-5.68425
Crtc2				x		Creb1	ptf	-5.64653
Crtc2				x		Creb3l2	ntf	-5.64653
Crtc2				x		Creb5	ptf	-5.64653
Egln1						Hif1a	ptf	-5.56879
Supt4a						Tbp	ntf	-5.50372
Taf9b						Tbp	ntf	-5.15504
Commd4						Hif1a	ptf	-5.02
Lin52						Lin54	ptf	-4.99034
Rbbp5						Gata1	ptf	-4.91586
Mapk1	kin			x	s	Creb1	ptf	-4.78563
Mapk1	kin			x	s	Creb3l2	ntf	-4.77267
Mapk1	kin			x	s	Creb5	ptf	-4.77267
Mapk1	kin			x	s	Fos	ptf	-4.76893
Mapk1	kin			x	s	Jun	ptf	-4.76662
Mapk1	kin			x	s	Cebpb	ptf	-4.76029
Mapk1	kin			x	s	Mef2c	ptf	-4.76029
Mapk1	kin			x	s	Hif1a	ptf	-4.75943
Prph						Arnt	ptf	-4.54267
Dcun1d2						Hif1a	ptf	-4.50072
Dcun1d4						Hif1a	ptf	-4.34723
Nsdhl						Arnt	ptf	-4.27542
Sephs2						Arnt	ptf	-4.25734
H2afz						Gata1	ptf	-3.97166
H2afz						Fos	ptf	-3.96187
H2afz						Jun	ptf	-3.96187
Dcun1d5						Hif1a	ptf	-3.89478
Gpx1						Arnt	ptf	-3.82769
Kat2a						Tbp	ntf	-3.81145
Gosr1						Cux1	ntf	-3.69438
Mapk12	kin	ko_neg	oe_pos	x	s	Creb3l2	ntf	-3.65618
Mapk12	kin	ko_neg	oe_pos	x	s	Creb5	ptf	-3.65618
Mapk12	kin	ko_neg	oe_pos	x	s	Creb1	ptf	-3.65595
Mapk12	kin	ko_neg	oe_pos	x	s	Jun	ptf	-3.64938
Mapk12	kin	ko_neg	oe_pos	x	s	Fos	ptf	-3.6469
Mapk12	kin	ko_neg	oe_pos	x	s	Cebpb	ptf	-3.64515
Mapk12	kin	ko_neg	oe_pos	x	s	Mef2c	ptf	-3.64515
Mapk12	kin	ko_neg	oe_pos	x	s	Mef2a	ptf	-3.63605
Mapk12	kin	ko_neg	oe_pos	x	s	Mef2d	ptf	-3.63605
Mapk12	kin	ko_neg	oe_pos	x	s	Fosl1	ptf	-3.63602
Mapk12	kin	ko_neg	oe_pos	x	s	Fosl2	ptf	-3.63602
Mapk12	kin	ko_neg	oe_pos	x	s	Junb	ptf	-3.63602
Mapk12	kin	ko_neg	oe_pos	x	s	Jund	ptf	-3.63602
Cog7						Cux1	ntf	-3.50689
Ubxn7						Hif1a	ptf	-3.50522
Commd3						Hif1a	ptf	-3.4918
Hmox2						Arnt	ptf	-3.42791
Rps6ka6	kin	ko_pos				Creb1	ptf	-3.28345
Akr1c14						Arnt	ptf	-3.25472
Prkg1	kin	ko_pos		x		Creb1	ptf	-3.11625
Prkg1	kin	ko_pos		x		Creb3l2	ntf	-3.11625
Prkg1	kin	ko_pos		x		Creb5	ptf	-3.11625
Prkacb	kin			x	s	Fos	ptf	-3.07594
Prkacb	kin			x	s	Jun	ptf	-3.07428
Prkacb	kin			x	s	Creb1	ptf	-3.07341
Prkacb	kin			x	s	Creb3l2	ntf	-3.07338
Prkacb	kin			x	s	Creb5	ptf	-3.07338
Prkacb	kin			x	s	Mef2c	ptf	-3.06728
Prkacb	kin			x	s	Atf1	ptf	-3.06356
Prkacb	kin			x	s	Mef2a	ptf	-3.06057
Prkacb	kin			x	s	Mef2d	ptf	-3.06057
Prkacb	kin			x	s	Crem	ptf	-3.05899
Cog3						Cux1	ntf	-2.90042
Cog1						Cux1	ntf	-2.83999
Cog6						Cux1	ntf	-2.78471
Mtor	kin					Hif1a	ptf	-2.71166
Commd10						Hif1a	ptf	-2.61284
Prkcb	kin	ko_pos		x		Fos	ptf	-2.57631
Prkcb	kin	ko_pos		x		Creb1	ptf	-2.57345
Prkcb	kin	ko_pos		x		Creb3l2	ntf	-2.57343
Prkcb	kin	ko_pos		x		Creb5	ptf	-2.57343
Camk2a	kin		oe_pos	x		Creb1	ptf	-2.56571
Camk2a	kin		oe_pos	x		Creb3l2	ntf	-2.56571
Camk2a	kin		oe_pos	x		Creb5	ptf	-2.56571
Camk2a	kin		oe_pos	x		Atf1	ptf	-2.5592
Acat2						Arnt	ptf	-2.5588
Cryl1						Arnt	ptf	-2.23485
Pik3r3						Hif1a	ptf	-2.18516
Ppp1cc				x		Creb1	ptf	-2.17643
Ppp1cc				x		Creb3l2	ntf	-2.17643
Ppp1cc				x		Creb5	ptf	-2.17643
Ykt6						Cux1	ntf	-2.09293
Ncbp2						Tbp	ntf	-2.09077
Aldh9a1						Arnt	ptf	-2.07433
Enoph1						Arnt	ptf	-2.03886
Acsl4						Arnt	ptf	2.01029
Dyrk1a	kin					Lin54	ptf	2.06416
Phgdh						Arnt	ptf	2.10274
Csnk1e	kin		oe_pos			Clock	ntf	2.23441
Csnk1d	kin					Clock	ntf	2.54442
Stx5a						Cux1	ntf	2.56466
Ddx21						Tbp	ntf	2.80586
Cyp1b1						Arnt	ptf	2.8183
Aldh1a1						Arnt	ptf	2.84289
Wtip						Hif1a	ptf	2.91038
Dcxr						Arnt	ptf	3.43607
Slc16a1						Arnt	ptf	3.77897
Man1c1						Cux1	ntf	4.20461
Nras						Fos	ptf	4.29358
Nras						Jun	ptf	4.29358
Nras						Hif1a	ptf	4.29415
H3f3a						Fos	ptf	4.30769
H3f3a						Jun	ptf	4.30769
H3f3a						Gata1	ptf	4.30797
Cd3eap						Tbp	ntf	4.31941
Mapk14	kin	ko_neg	oe_neg	x	s	Mef2a	ptf	4.34535
Mapk14	kin	ko_neg	oe_neg	x	s	Mef2d	ptf	4.34535
Mapk14	kin	ko_neg	oe_neg	x	s	Fosl1	ptf	4.34538
Mapk14	kin	ko_neg	oe_neg	x	s	Fosl2	ptf	4.34538
Mapk14	kin	ko_neg	oe_neg	x	s	Junb	ptf	4.34538
Mapk14	kin	ko_neg	oe_neg	x	s	Jund	ptf	4.34538
Mapk14	kin	ko_neg	oe_neg	x	s	Cebpb	ptf	4.34768
Mapk14	kin	ko_neg	oe_neg	x	s	Mef2c	ptf	4.34768
Mapk14	kin	ko_neg	oe_neg	x	s	Creb3l2	ntf	4.35108
Mapk14	kin	ko_neg	oe_neg	x	s	Creb5	ptf	4.35108
Mapk14	kin	ko_neg	oe_neg	x	s	Creb1	ptf	4.35626
Mapk14	kin	ko_neg	oe_neg	x	s	Jun	ptf	4.35767
Mapk14	kin	ko_neg	oe_neg	x	s	Fos	ptf	4.35859
Hmgcr						Arnt	ptf	4.44503
Man2a1						Cux1	ntf	4.57981
Fa2h						Arnt	ptf	4.93471
Man1a						Cux1	ntf	5.14662
Carm1				x		Tbp	ntf	5.73638
Carm1				x		Fos	ptf	5.73696
Carm1				x		Jun	ptf	5.73696
Mapk7	kin					Mef2c	ptf	5.8026
Mapk7	kin					Fos	ptf	5.80289
Mapk7	kin					Jun	ptf	5.80289
Hbegf						Hif1a	ptf	5.80692
Ugdh						Arnt	ptf	6.32631
Eno3						Arnt	ptf	7.31566
Atf6b				x	s	Creb1	ptf	7.52585
Atf6b				x	s	Fos	ptf	7.52585
Atf6b				x	s	Atf1	ptf	7.52585
Atf6b				x	s	Creb3l2	ntf	7.52585
Atf6b				x	s	Creb5	ptf	7.52585
Rras						Hif1a	ptf	7.58199
Rab33b						Cux1	ntf	7.90562
Bet1l						Cux1	ntf	8.35767
Crcp						Tbp	ntf	9.02566
Supt5						Tbp	ntf	9.12154
Nadk	kin		oe_pos			Arnt	ptf	10.1319
Txnrd1						Arnt	ptf	12.3702
Mras						Hif1a	ptf	14.0028
Gpnmb						Hif1a	ptf	16.3523
Cbr1						Arnt	ptf	16.4375
H3f3b					s	Fos	ptf	19.3455
H3f3b					s	Jun	ptf	19.3455
H3f3b					s	Gata1	ptf	19.3597
Ctss					s	Creb1	ptf	25.4102
Rps6ka1	kin	ko_pos			s	Creb1	ptf	27.0951
Rras2					s	Hif1a	ptf	27.5814
Mapkapk2	kin	ko_neg			s	Creb1	ptf	28.7179
Hsd17b7					s	Arnt	ptf	32.5744
Cry2					s	Clock	ntf	38.6303
Scai					s	Srf	ntf	71.4615
Cdkn1a					s	E2f3	ntf	78.8212
Camk1	kin			x	s	Atf1	ptf	158.485
Camk1	kin			x	s	Creb1	ptf	158.487
Camk1	kin			x	s	Creb3l2	ntf	158.487
Camk1	kin			x	s	Creb5	ptf	158.487
